# Supplementary material
Source: Springer Nature journal article supplement (https://www.springermedizin.de/resource/supplementary/13256_2007_439_MOESM1_ESM.pdf/9645990)

Right cervical nodes

Right paratracheal nodes

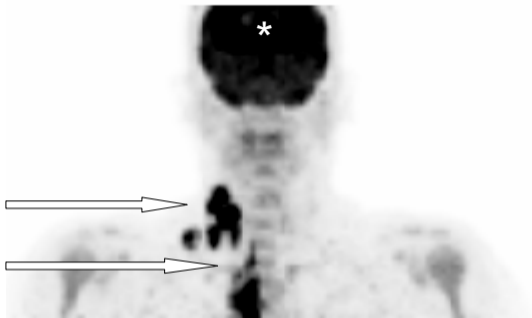

Normal cerebral uptake (\*)

Supplement: MOESM1 [file 9645990]
